# Supplementary material
Source: Springer Nature journal article supplement (https://www.springermedizin.de/resource/supplementary/12931_2011_1155_MOESM6_ESM.pdf/9425448)

(A)

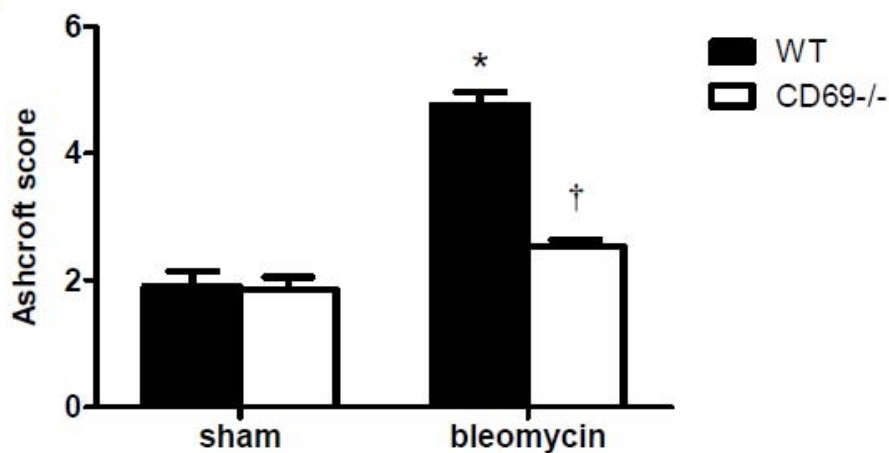

(B)

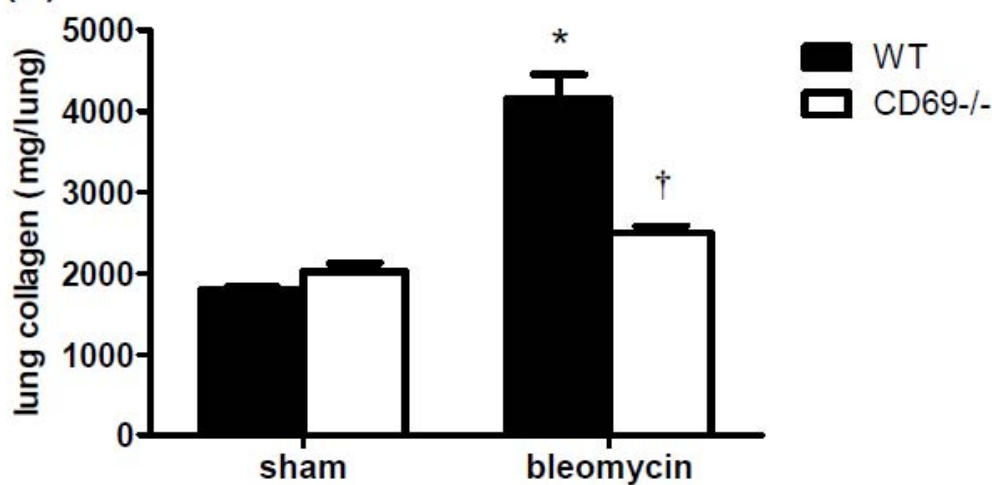

(C)

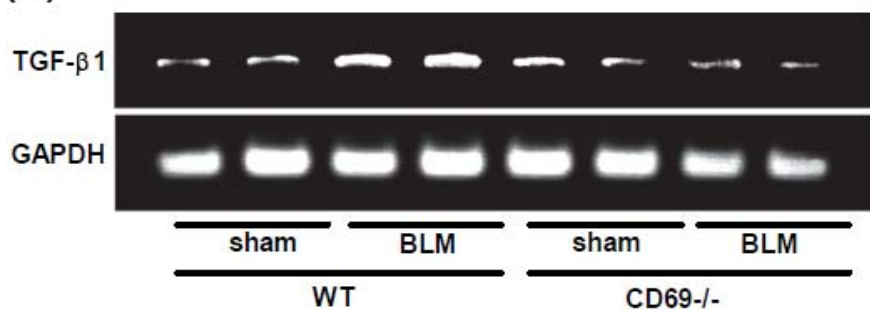

Supplement: MOESM6 [file 9425448]
